# Supplementary material
Source: PubMed Central journal article supplement (PMC9712648)
Supplement: 41467_2022_35240_MOESM2_ESM.pdf [file 41467_2022_35240_MOESM2_ESM.pdf]

## Description of Additional Supplementary Files

File name: Supplementary Code 1

Description: STATA code for producing results in paper "Post-covid medical complaints following infection with SARS-CoV-2 Omicron vs Delta variants", by Magnusson et al., 2022.
